# Supplementary material for: Detection of a miRNA biomarker for cancer diagnosis using SERS tags and magnetic separation
Source: Royal Society of Chemistry journal article supplement (doi:10.1039/d2ay00210h), 2022-01-01
Supplement: d2ay00210h1.pdf [file d2ay00210h1.pdf]

## Detection of a miRNA biomarker for cancer diagnosis using SERS tags and magnetic separation

Kiatnida Treerattrakoon,<sup>a,c</sup> Pimporn Roekrungruang,<sup>a</sup> Tararaj Dharakul,<sup>b</sup> Deanpen Japrungr,<sup>a</sup> Karen Faulds,<sup>c</sup> Duncan Graham,<sup>c</sup> and Suwussa Bamrungsap<sup>\*a</sup>

<sup>a</sup>National Nanotechnology Center (NANOTEC), National Science and Technology Development Agency (NSTDA), Pathumthani 12120, Thailand.

<sup>b</sup>Department of Immunology, Faculty of Medicine Siriraj Hospital, Mahidol University, Bangkok 10700, Thailand.

<sup>c</sup>Department of Pure and Applied Chemistry, Technology and Innovation Centre, University of Strathclyde, 99 George Street, Glasgow, UK.

\*Corresponding Author's E-mail: [suwussa@nanotec.or.th](mailto:suwussa@nanotec.or.th)

### Supplementary Material

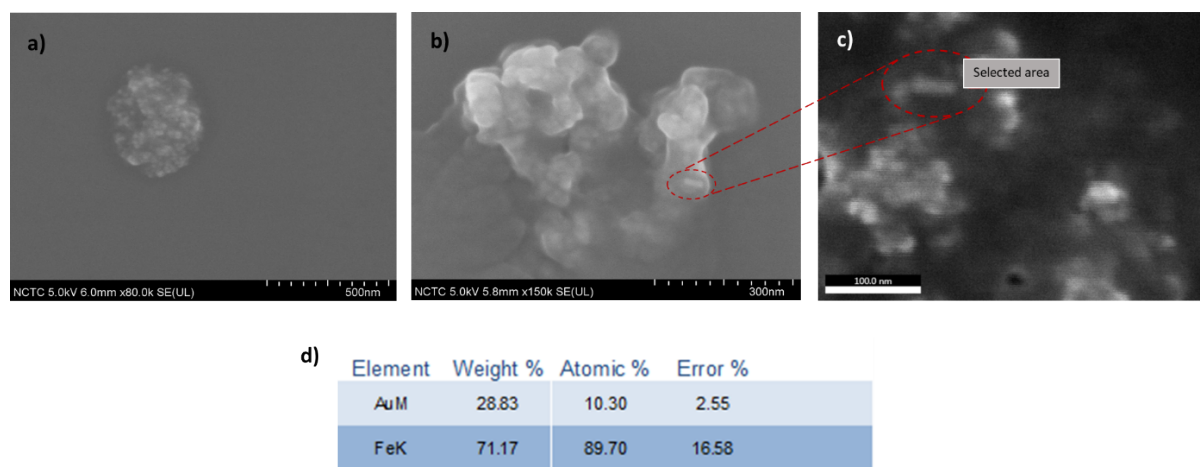

Fig. S1 (a) SEM image of the separated MNP from the negative control without miR-29a (b) SEM image of the MNP-miRNA-SERS tag sandwich complex in the presence of the target miR-29a (c) The magnified image of SERS tag attached on the MNP surface indicating the sandwich complex formation (d) The EDX analysis identified the main elements of the selected area
